# Supplementary material
Source: PubMed Central journal article supplement (PMC2865884)
Supplement: pr901019z_si_002.pdf [file pr901019z_si_002.pdf]

Supplement

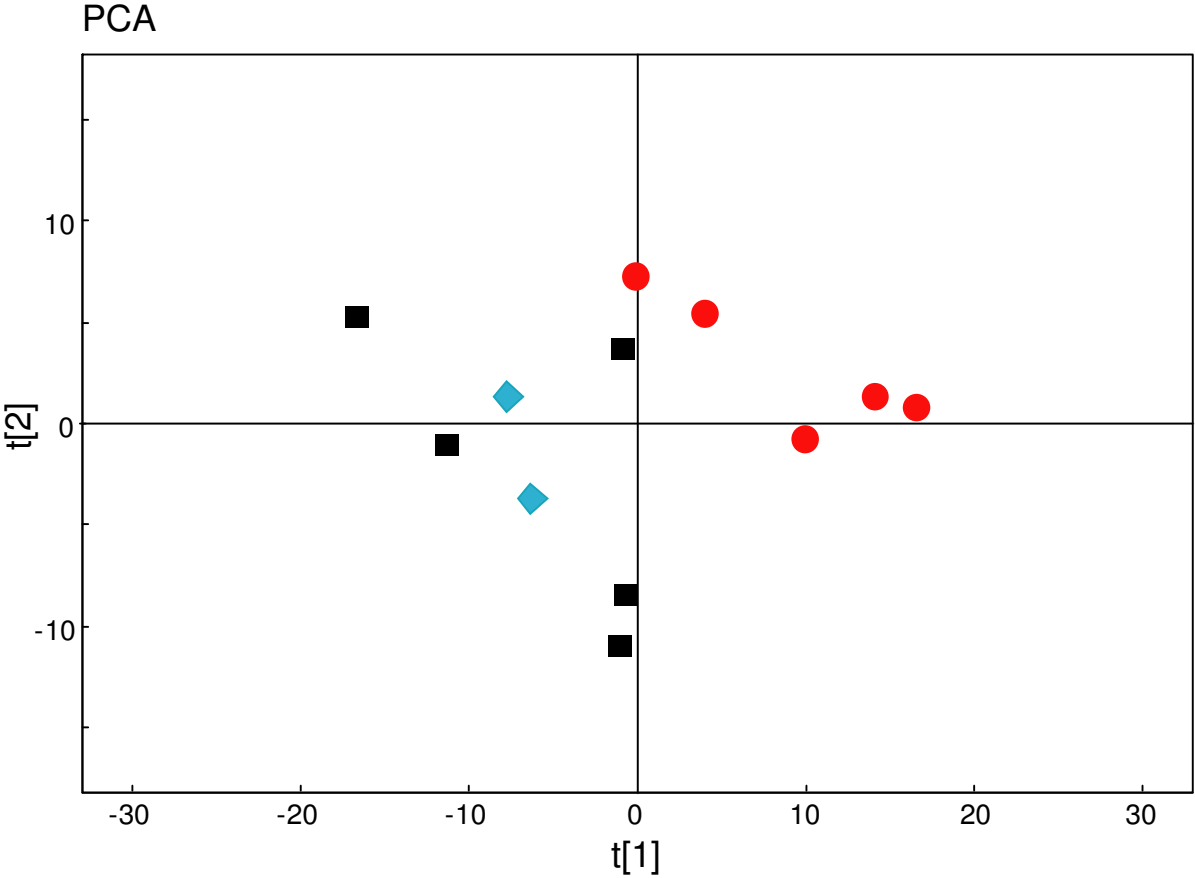

**Figure S1.** PCA analysis of <sup>1</sup>H NMR spectra of plasma in *S. mansoni*-infected (red), non-infected control mice (black) and two animals which were infected but where infection failed to establish (blue) during the course of the experiment. The model was constructed using 2 principal components, ( $R^2_{cum}X=0.81$ ,  $Q^2X=0.66$ ).

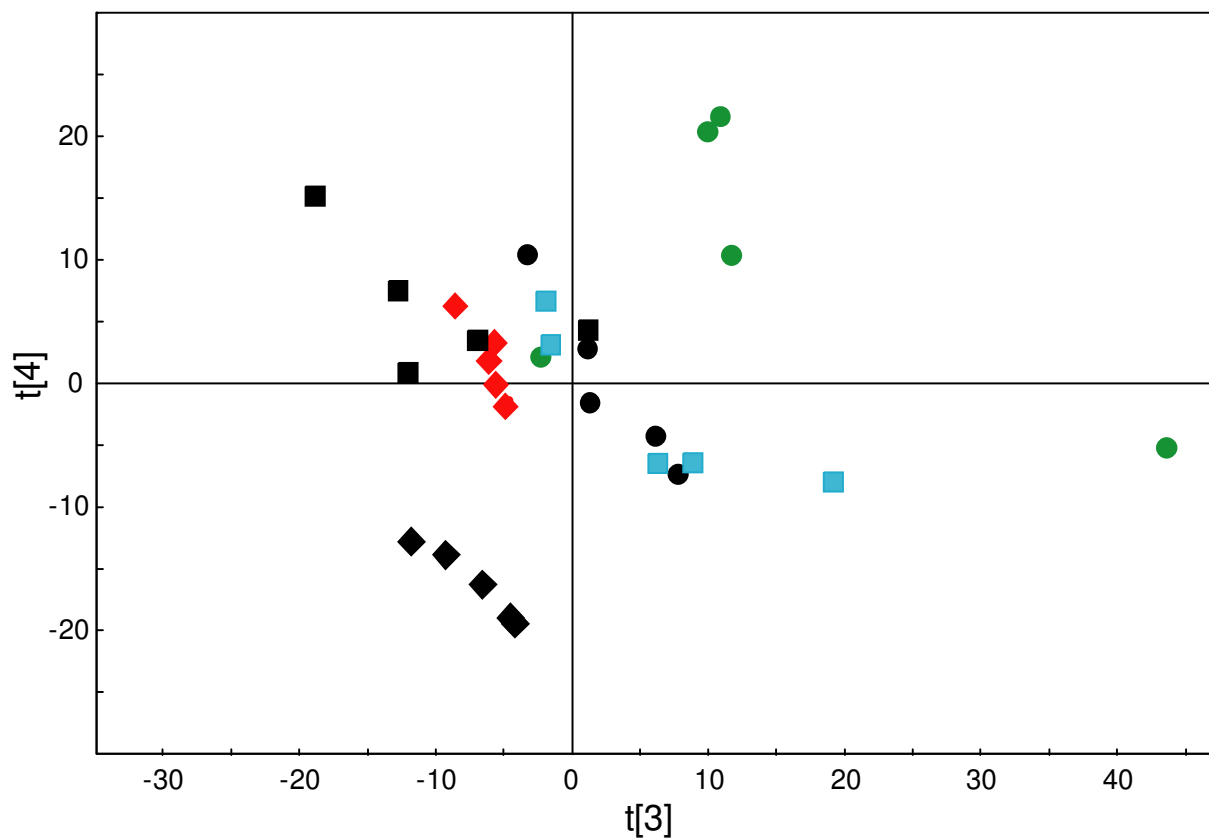

**Figure S2.** Global PCA scores plot of plasma <sup>1</sup>H NMR spectral data of *S. mansoni*-infected (red), *T. b. brucei*-infected (green), *P. berghei*-infected (blue) and non-infected control mice (black). The model was built using 2 principal components, ( $R^2_{cum}X=0.70$ ,  $Q^2X=0.53$ ).

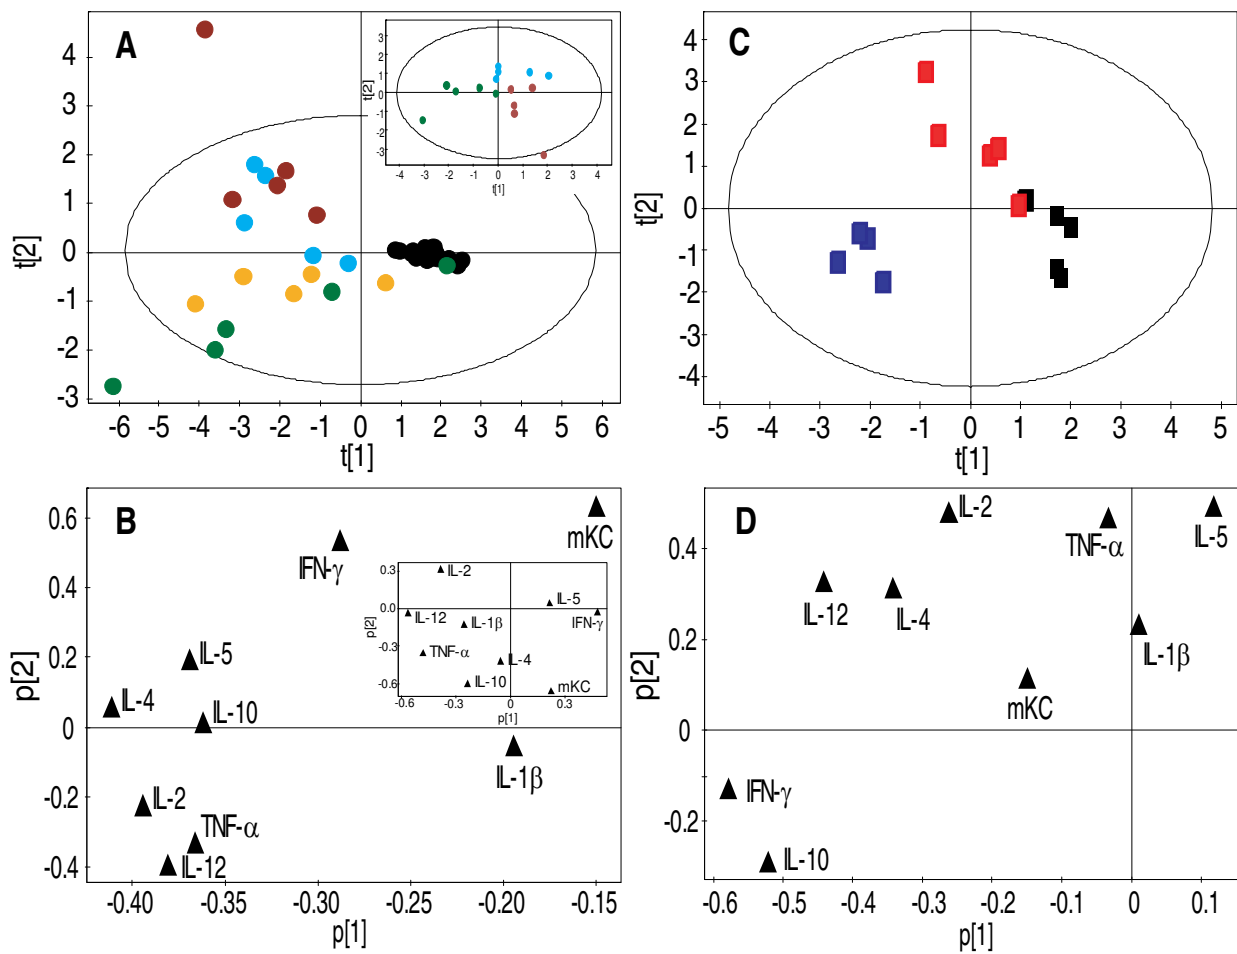

**Figure S3.** O-PLS-DA scores (A) and corresponding loading plots ( $R^2Y= 0.38$ ,  $Q^2Y= 0.26$ ; inset:  $R^2Y= 0.56$ ,  $Q^2Y= 0.08$ ). (B) derived from *T. brucei brucei*-mouse  $R^2Y= 0.79$ ,  $Q^2Y= 0.63$ ). Two principal components were used for each model (**black**: uninfected controls; **brown**: 7 days postinfection (D<sub>7</sub>); **light-blue**: D<sub>14</sub>; **yellow**: D<sub>21</sub>; **green**: D<sub>28</sub>); inset shows the O-PLS-DA plots obtained from the infected mice at D<sub>7</sub>, D<sub>14</sub> and D<sub>28</sub>), *P. berghei*-mouse (C, D, **black**: preinfection; **red**: D<sub>2</sub>; **blue**: D<sub>4</sub>).
